# Supplementary material for: SOX10 mediates glioblastoma cell-state plasticity
Source: PubMed Central journal article supplement (PMC11549307; doi:10.1038/s44319-024-00258-8), 2024-09-16
Supplement: 44319_2024_258_MOESM8_ESM.pdf [file 44319_2024_258_MOESM8_ESM.pdf]

## Expanded View Figures

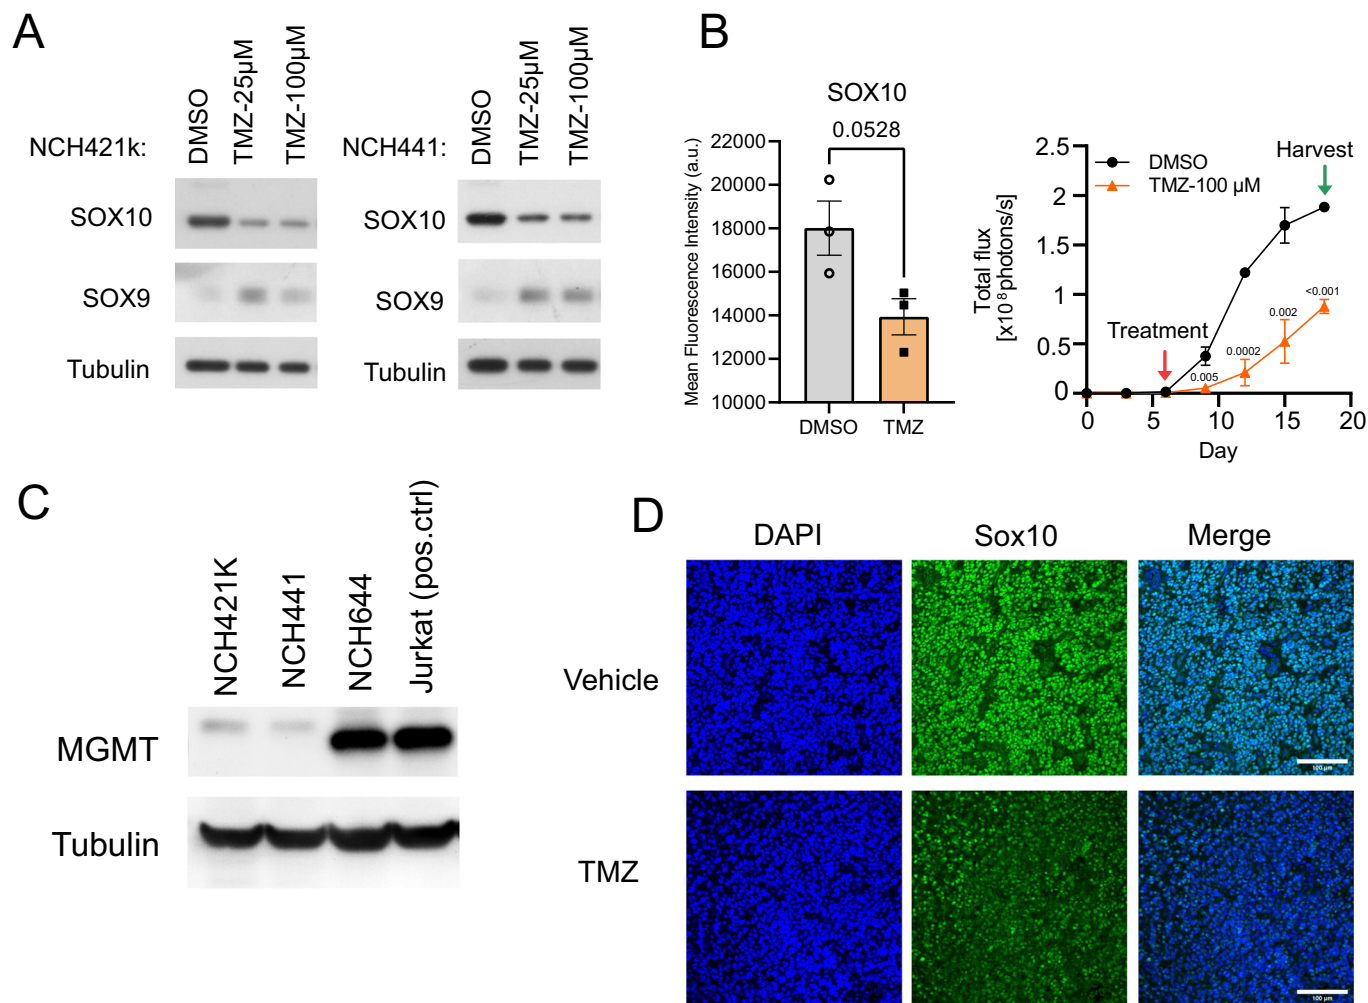

**Figure EV1. Temozolomide represses SOX10 expression.**

(A) Western blot analysis showing short-term (7-day) temozolomide treatment effects on SOX10 and SOX9 expression in NCH421k and NCH441 human glioblastoma cells. (B) Temozolomide-induced reduction of SOX10 expression (left) and cell proliferation (right) of GFP and luciferase dual-labeled NCH644 glioblastoma cells growing in iPSC-derived cerebral organoids. Treatment with DMSO or 100 µM TMZ was started on day 6, and organoids were harvested on day 18. SOX10 expression was analyzed by recording mean fluorescence intensities by flow cytometry on day 18. Cell proliferation was monitored by bioluminescence (photon flux per second) imaging every 3 days.  $n = 3$  organoids; mean  $\pm$  SEM;  $P$  values were computed with two-tailed unpaired  $T$  tests. (C) Western blot analysis showing MGMT expression levels in SOX10-high glioblastoma stem cells. Protein lysate from Jurkat cells was used as the positive control for MGMT expression. (D) Immunofluorescence staining of Sox10 and Sox9 in the vehicle and TMZ-treated mice (Pdgfb/Akt RCAS glioblastoma mouse model) (Rusu et al, 2019). Scale bars = 100 µm. Related to Fig. 1.

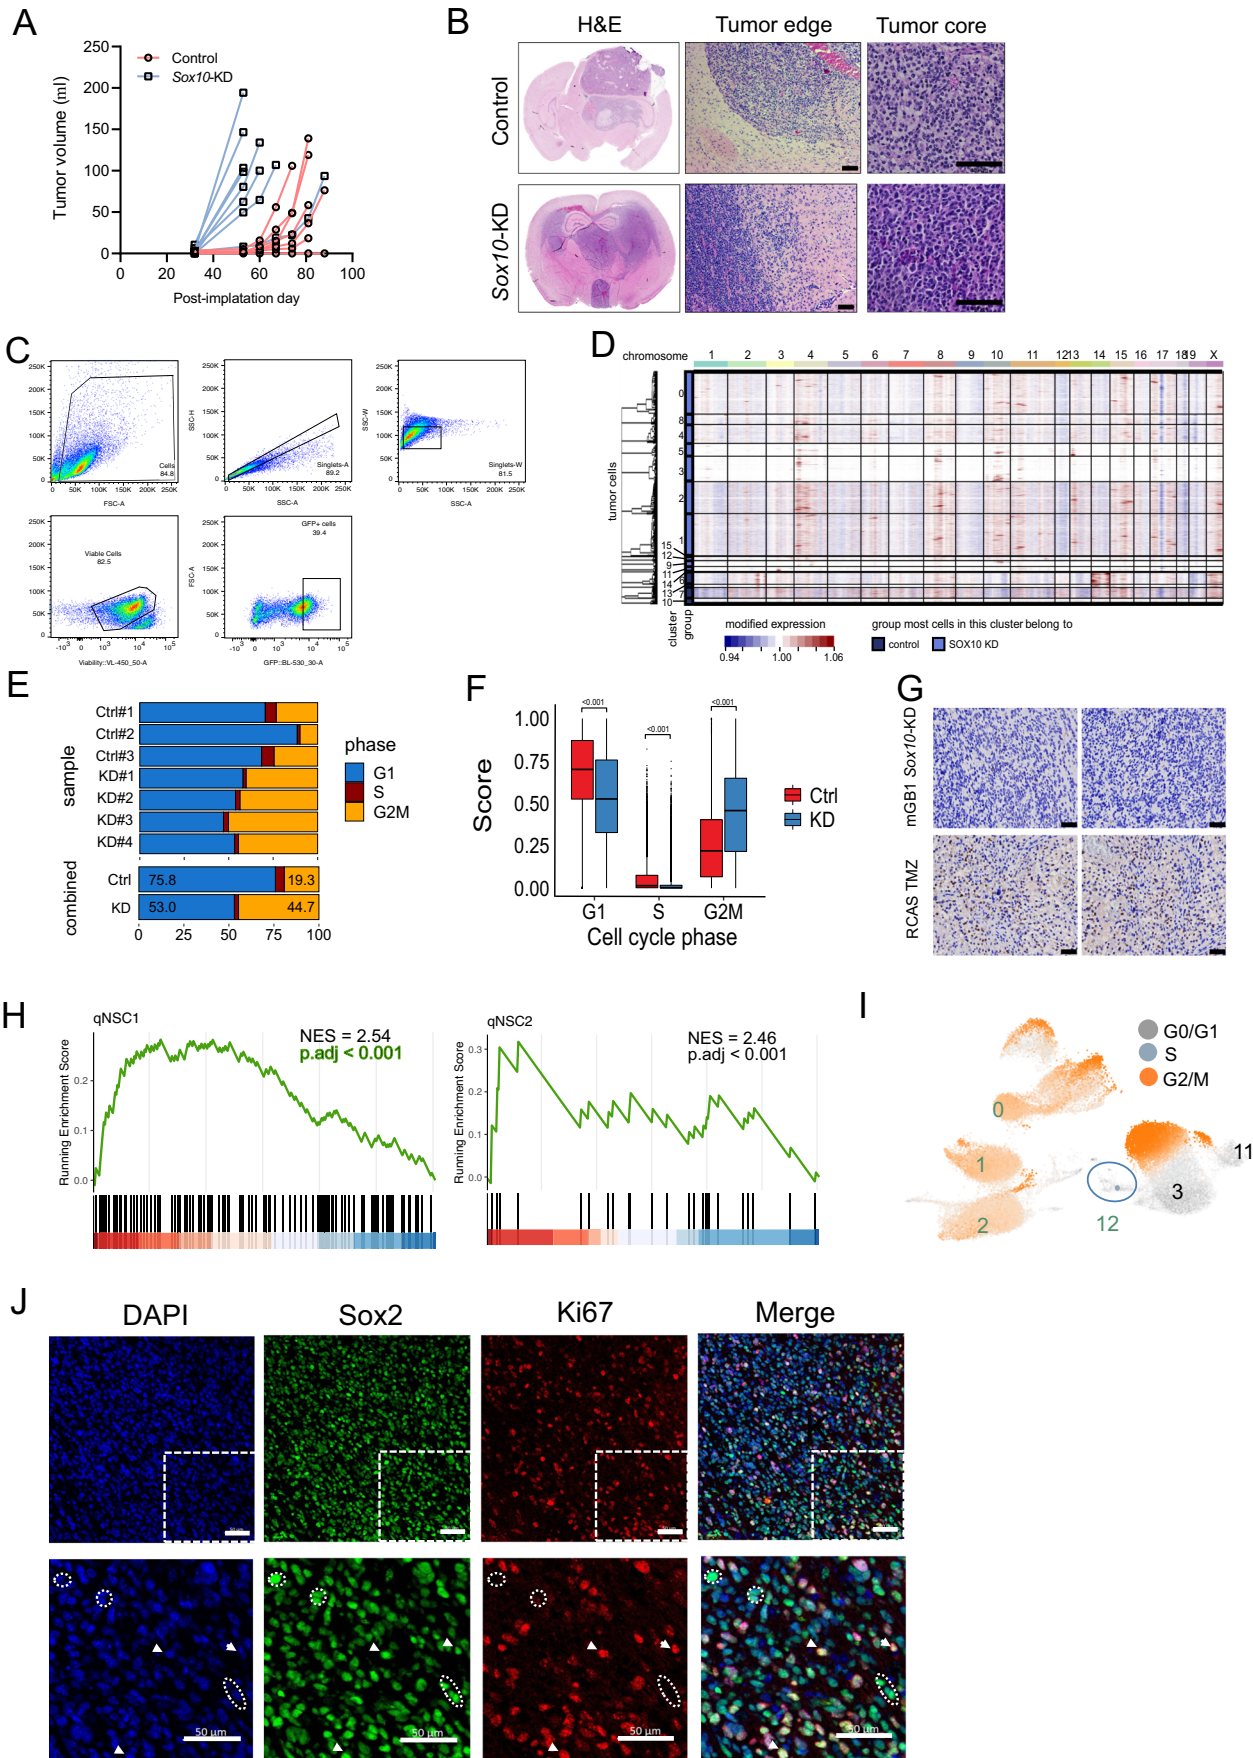

**Figure EV2. Single-cell RNA sequencing analysis of control and Sox10-KD tumors.**

(A) Tumor formation in C57BL6/J mice injected with mGB1 cells expressing non-targeting shRNA (control) and shRNA against Sox10 (Sox10-KD) (B) H&E staining of coronal brain sections of mice bearing Ctrl and KD tumors. Note that while both tumors resemble grade 4 glioblastoma, Sox10-KD tumors have a distinct bi-hemispheric growth pattern, as opposed to the bulky, circumscribed growth observed in the control tumors. Scale bar = 100  $\mu$ m. (C) Gating strategies for isolating GFP-positive tumor cells. (D) Analysis of the copy number variations in GFP-positive tumor cells inferred by the R-package infercnv and using GFP-negative cells as reference. Tumor cells are arranged by Seurat clusters (rows) and chromosomes (columns). Copy number gains, red; losses, blue. (E) Cell cycle phase distributions of the individual tumors. (F) Boxplots showing G1, S and G2/M phase scores in control and Sox10-KD tumors. For G1, S and G2M phases,  $n = 6747/31090$  cells,  $293/1262$  cells and  $1296/25182$  cells from Ctrl and KD tumors, respectively. The box-and-whisker plot shows the interquartile range (box), the median cell cycle scores (line inside the box), and the range of data within 1.5 times the interquartile range from the first and third quartiles (whiskers).  $P$  values were computed using two-tailed Wilcoxon's rank-sum tests.  $***P < 0.001$ . (G) Immunohistochemistry staining of gamma H2AX (a DNA-damage marker) in KD tumors. TMZ-treated glioblastoma mouse model (bottom) is used as a positive control for the staining. Two fields of view were shown. Scale bars = 50  $\mu$ m. (H) GSEA plot showing the enrichment of qNSC gene signatures (Kalamakis et al, 2019) in cluster 12. Adjusted  $P$  values ( $P_{adj}$ ) were calculated using the Benjamini-Hochberg method. (I) UMAP visualization of the cell cycle phases of KD tumor cells. Cluster 12 is the qNSC-like cluster. Clusters 0, 1, 2 are the fast-cycling progenitor cell-like tumor cells. Cluster 3 and 11 are the more differentiated tumor cells. (J) Immunofluorescence images of co-staining Sox2 (a tumor stem cell marker) and Ki67 (a non-G0/proliferation marker) in KD tumors. The bottom right quadrant of the images were magnified in the bottom panel to highlight the presence of slow-cycling tumor stem cells (Sox2 + /Ki67-, dotted circles) and fast-cycling tumor stem cells (Sox2 + /Ki67 +, arrows). Scale bars = 50  $\mu$ m. Related to Fig. 2.

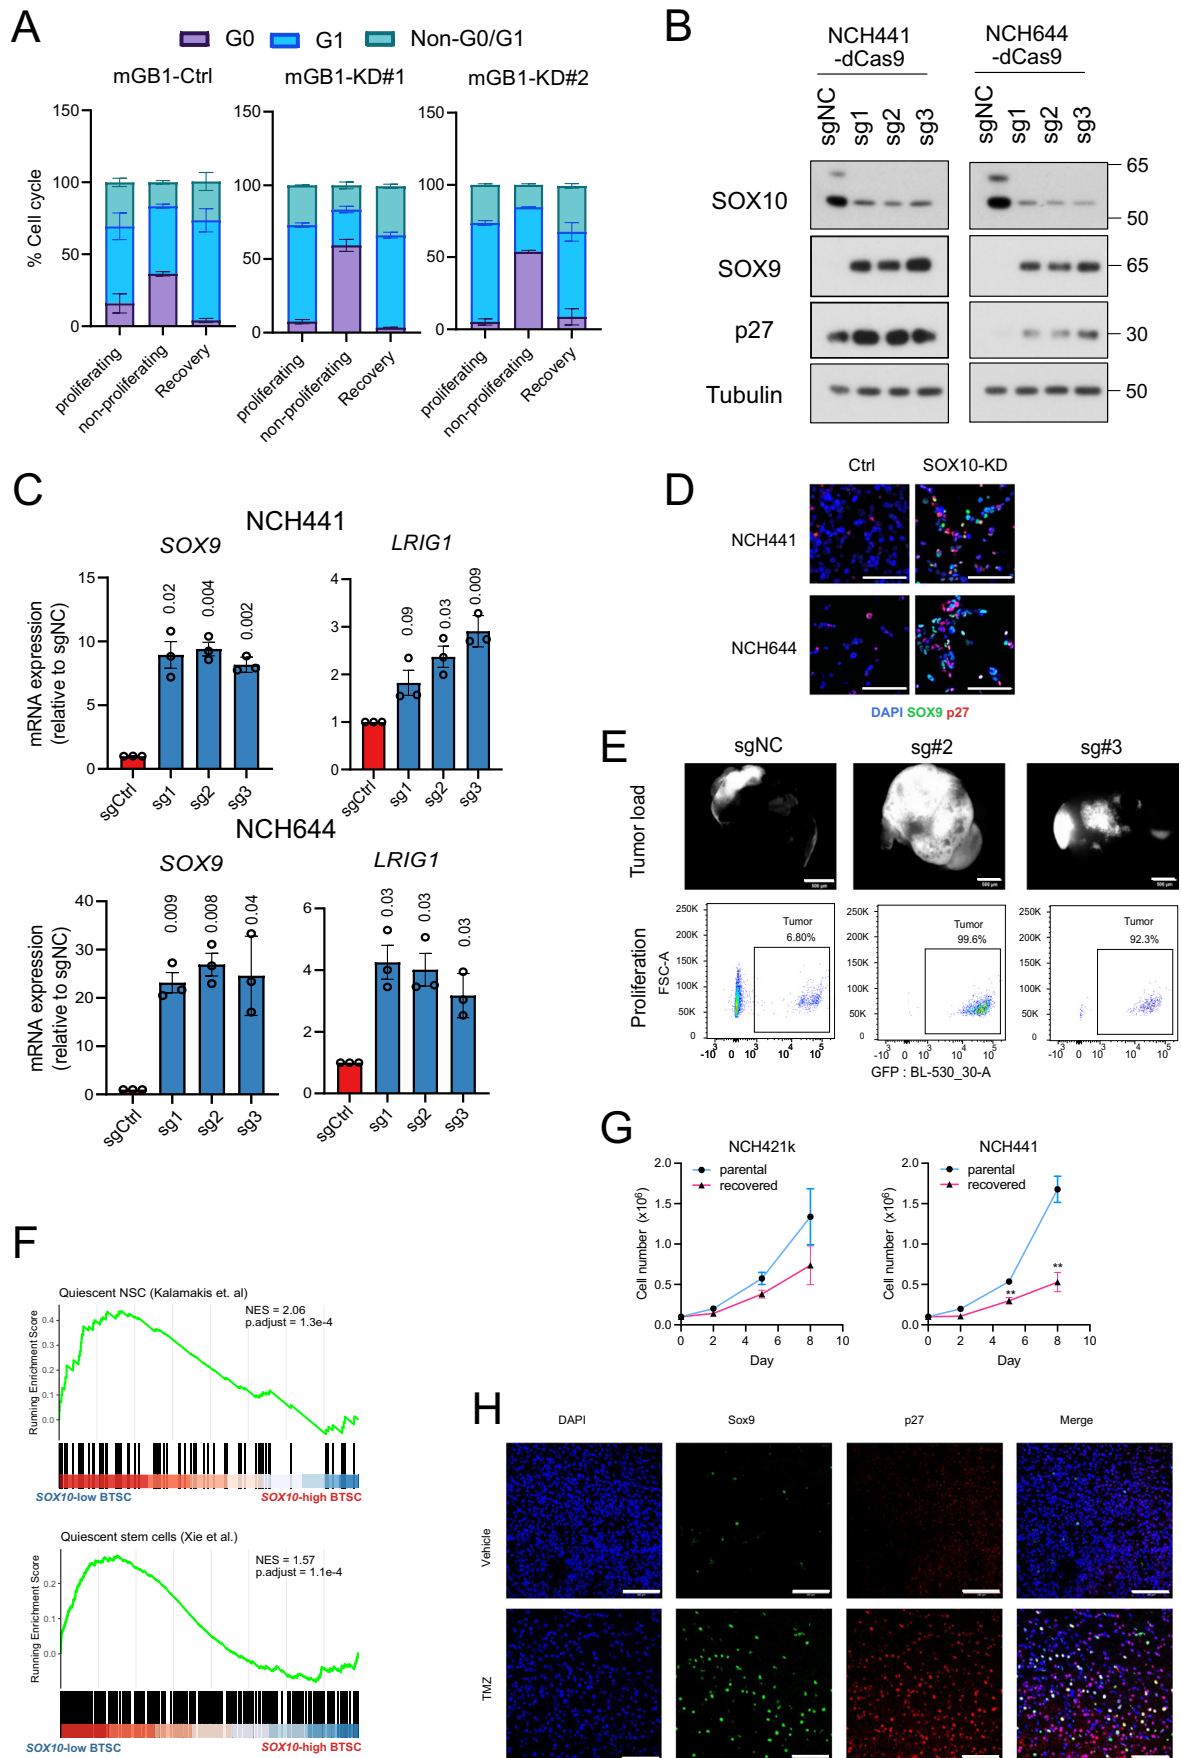

**◀ Figure EV3. SOX10 suppression induces quiescent stem cell features.**

(A) Bar plots showing the distribution of mGB1 control and *Sox10*-KD cells in the G0, G1 and non-G0/G1 cell cycle phases. Error bars represent mean  $\pm$  SEM from three independent experiments. (B) Western blot showing the upregulation of SOX9 and p27 in control cells (sgNC) and *Sox10*-KD cells (transduced with sg1-3) in SOX10-high NCH441 and NCH644 cells. The molecular weights (in kDa) of the detected proteins are indicated on the right. (C) RNA expression of the qNSC markers SOX9 and *LRIG1*. Mean values  $\pm$  SEM relative to mGB1 control cells are shown;  $N = 3$  biological replicates;  $P$  values were calculated with one-sample  $T$  test. (D) Immunofluorescence images of NCH441 and NCH644 control and *SOX10*-KD cells co-stained with SOX9 and p27. Scale bars = 100  $\mu$ m. (E) GFP-tagged NCH644 control (sgNC) and *SOX10*-KD (sg#2 and sg#3) co-cultured with iPSC-derived cerebral organoids. Stereoscopic fluorescence images showing the growth on day 14 after co-culture. Scale bar = 500  $\mu$ m. The scatter plots below show the quantification of the tumor load by GFP flow cytometry. (F) GSEA plots showing the enrichment of slow-cycling stem cell signatures in SOX10-low vs. SOX10-high BTSCs. Adjusted  $P$  values ( $P_{adj}$ ) were calculated using the Benjamini-Hochberg method. (G) Growth curves of NCH421k and NCH441 parental cells and cells that have recovered after TMZ treatment. Mean values  $\pm$  SEM from three experiments are shown.  $P$  values were calculated using a two-tailed unpaired  $t$  test. (H) Sox9 and p27 immunofluorescence staining of tumor sections from mice treated with DMSO or TMZ (100 mg/kg, for 5 consecutive days). Scale bars = 100  $\mu$ m. Related to Fig. 3.

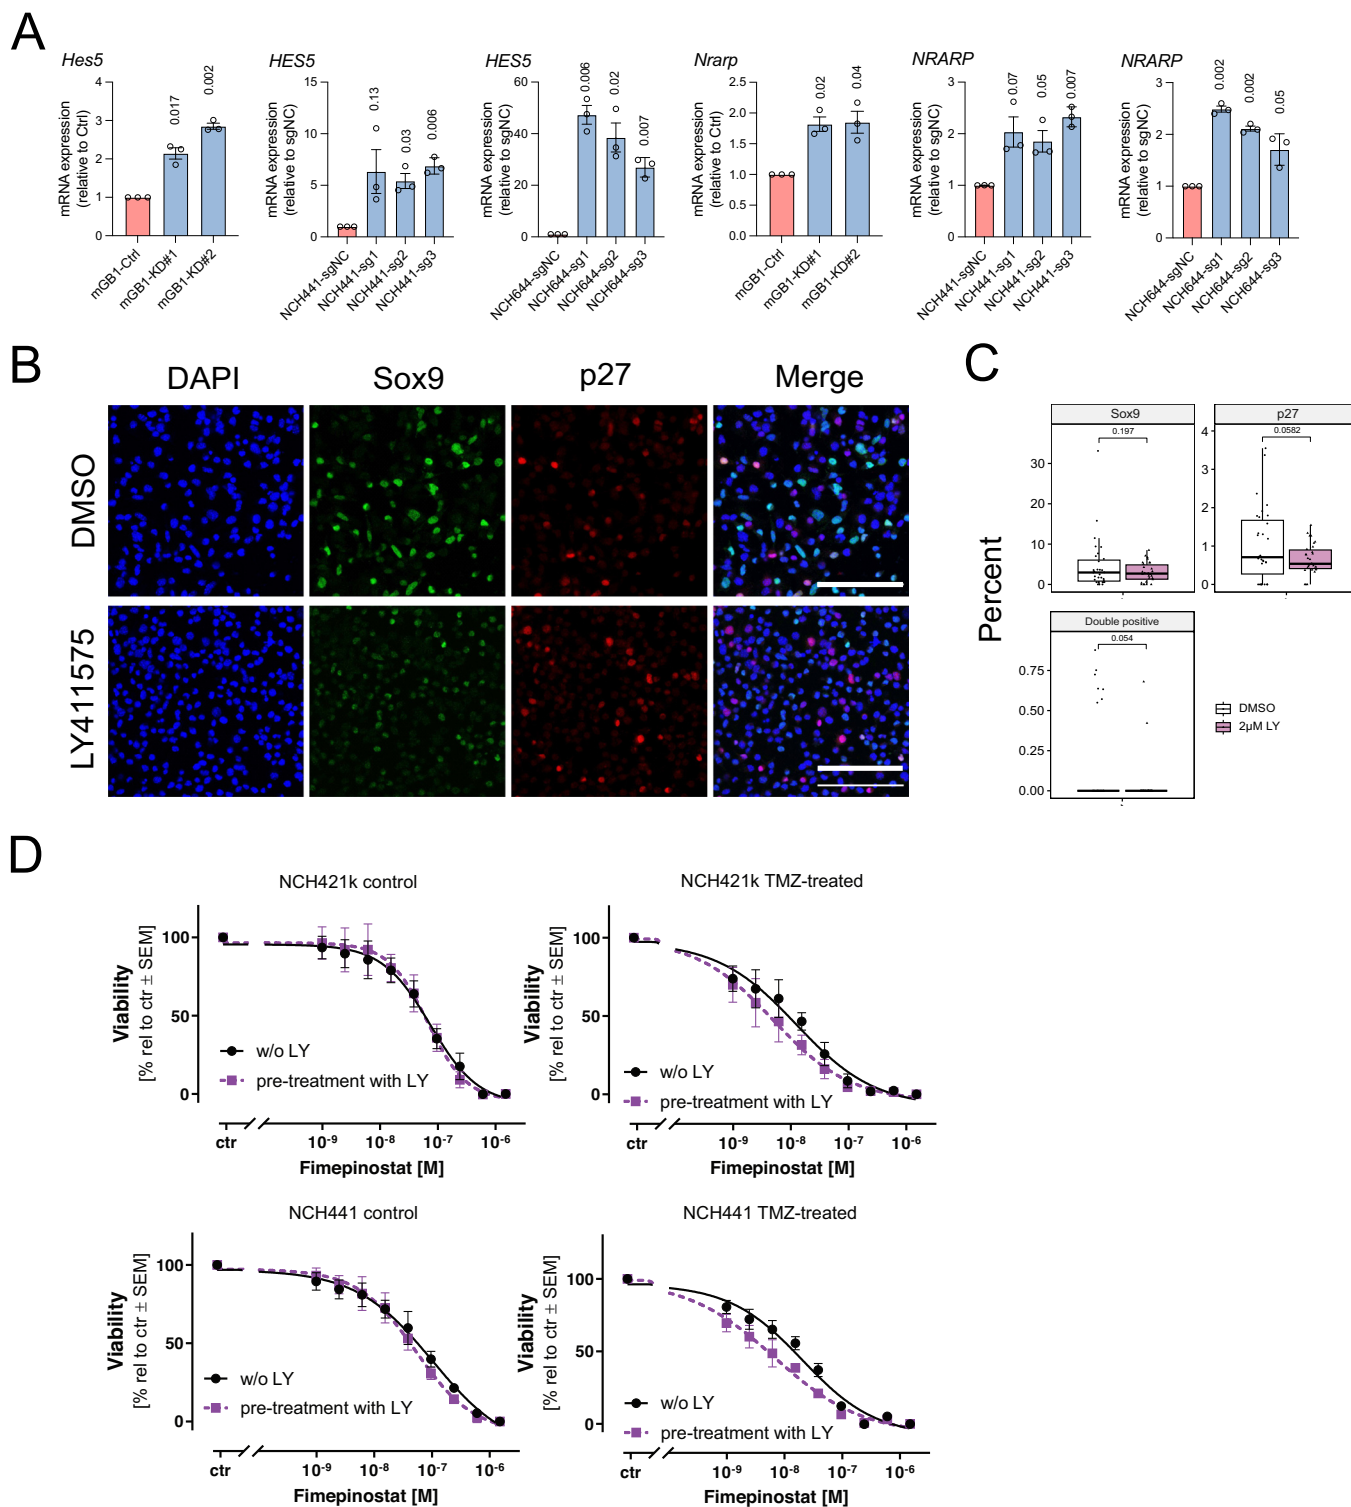

**◀ Figure EV4. Notch pathway upregulation and inhibition in Sox10-KD cells.**

(A) Quantification of relative RNA expression of Notch target genes (*HES5* and *NRARP*) in mouse and human glioblastoma spheroid cultures. Data are represented as mean  $\pm$  SEM expression levels relative to mGB1 control cells.  $n = 3$  biological replicates.  $P$  values were calculated using one-sample T tests. (B) Immunofluorescence images of mGB1 control cells stained with Sox9 and p27. Cells were cultured in reduced growth factor conditions with and without LY411575 treatment. Scale bars = 100  $\mu$ m. (C) Boxplots showing the results of the quantifications of the percentages of Sox9-positive, p27-positive and Sox9 and p27 double-positive cells. Each dot represents the percentage of cells from an image ( $n = 30$  images for each condition). The box-and-whisker plot shows the interquartile range (box), the median values (line inside the box), and the range of data within 1.5 times the interquartile range from the first and third quartiles (whiskers).  $P$  values were computed using two-tailed unpaired T tests. (D) Dose-response curves of Fimepinostat alone (black curve) and LY411575 + Fimepinostat (purple curve) in human glioblastoma cells (NCH421k and NCH441) with and without TMZ pre-treatment. Shown are the mean cell viability (%)  $\pm$  SEM from three technical replicates of one experiment. Related to Fig. 4.

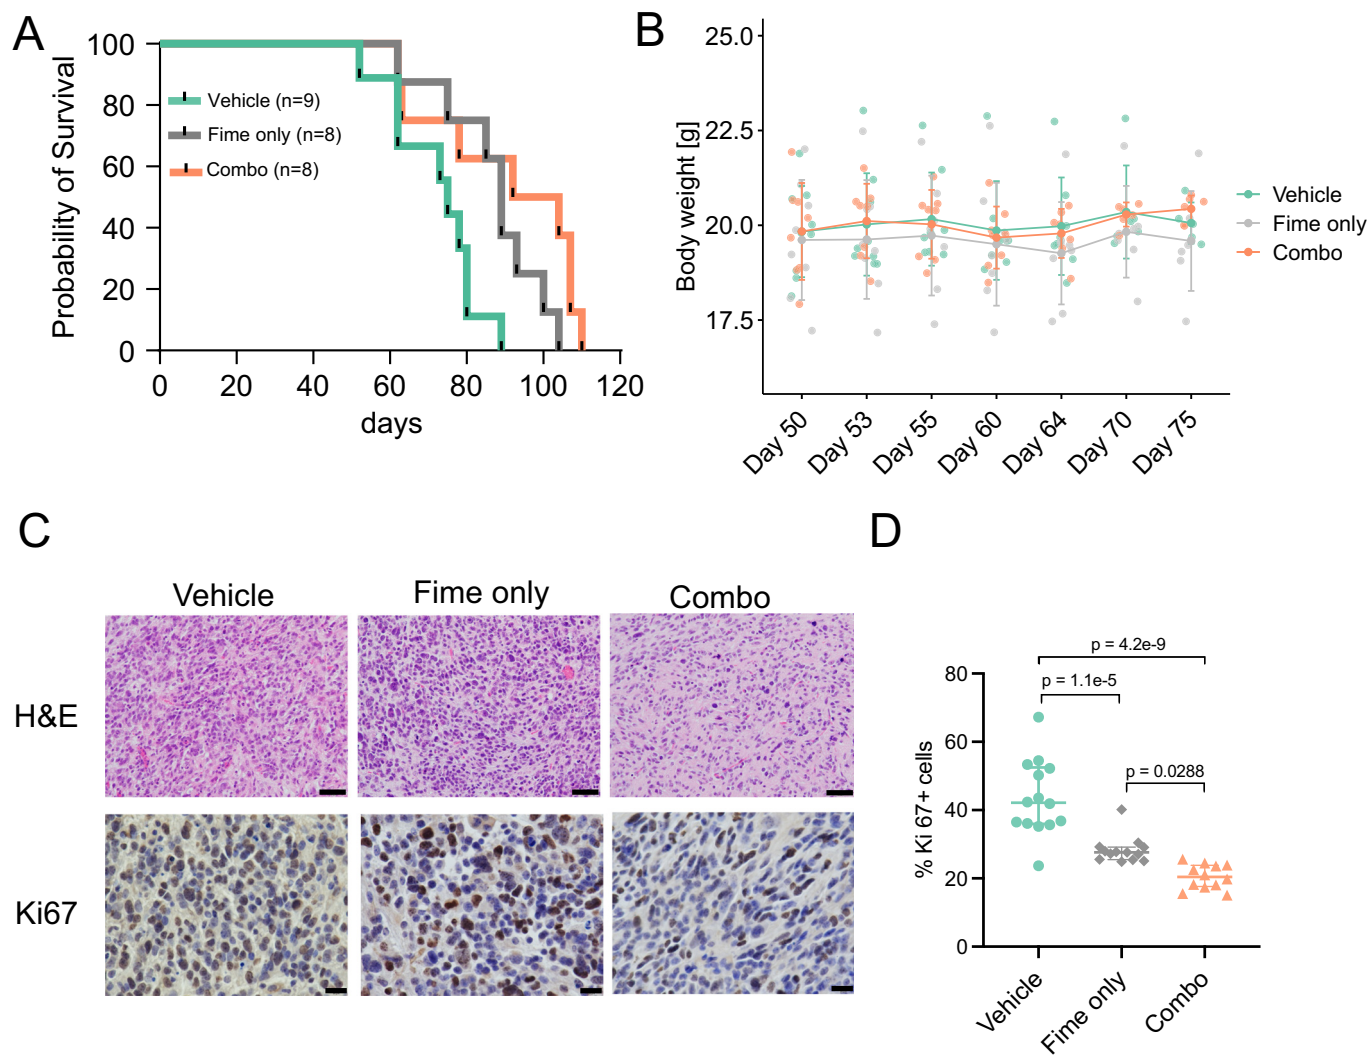

**Figure EV5. Fimepinostat treatment of mGB1 tumors in vivo.**

(A) Kaplan-Meier survival curves of mice intracranially injected with KD cells in Vehicle ( $n = 9$ ), Fime only ( $n = 8$ ) and Combo groups ( $n = 8$ ), respectively. (B) Body weight of animals prior to randomization (Day 50) and during the course of the treatment (Day 53 to Day 75). On day 50, the vehicle group had  $n = 9$  animals, the Fime only group had  $n = 8$  animals and the Combo group had  $n = 8$  animals. Shown are the mean values  $\pm$  SD. (C) H&E (top) and Ki67 staining (bottom) of end-stage tumors of each treatment group. Images of the Vehicle and Combo groups were reused from Fig. 5D. Scale bars for top and bottom panels are 50  $\mu$ m and 20  $\mu$ m, respectively. (D) Quantification of Ki67 positive cells in (C). Shown are the median values  $\pm$  interquartile ranges.  $P$  values were calculated with one-way ANOVA with Tukey post-hoc tests to test the level of significance among treatment groups ( $n = 12$ –13 images from three different animals in each group). Related to Fig. 5.
